# Supplementary material for: Comparison of the Spatial and Temporal Variability of Cloud Amounts over China Derived from Different Satellite Datasets
Source: MDPI journal article supplement (doi:10.3390/rs14092173), 2022-04-30
Supplement: s1 [file s1]

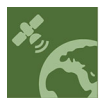

**Table S1.** Total cloud amount across the different observation times and different datasets in summer over NW region (unit: %). M\_mean is the mean cloud amount averaged over all datasets at each specific observation time, M\_range is the TCA range for all satellite datasets; T\_mean is the mean cloud amount averaged over all observation times for each satellite dataset, T\_range is the TCA range among different observation times. Bold value with an underscore is the mean value averaged over 11 satellite datasets at all observation times, and bold and italic value is for station observation.

|               | 01:30 | 03:00 | 07:30 | 09:00 | 10:30 | 13:30 | 15:00 | 19:30 | 21:00 | 22:30 | T_mean | T_range |
|---------------|-------|-------|-------|-------|-------|-------|-------|-------|-------|-------|--------|---------|
| ISCCP-D1      |       | 53.5  |       | 64.8  |       |       | 75.6  |       | 60.7  |       | 63.7   | 22.1    |
| PATMOSX       | 56.1  |       | 66.6  |       |       | 50.7  |       | 52.5  |       |       | 56.5   | 15.9    |
| MODIS-CE      | 41.7  |       |       |       | 40.9  | 50.8  |       |       |       | 46.8  | 45     | 9.9     |
| MODIS-ST      | 45.9  |       |       |       | 40.2  | 46.1  |       |       |       | 44.7  | 44.2   | 5.8     |
| HIRS          | 32.2  |       | 30.9  |       |       | 35.1  |       | 33.2  |       |       | 32.9   | 4.2     |
| TOVSB         | 60.2  |       | 56.2  |       |       | 57.4  |       | 62.2  |       |       | 59     | 6       |
| AIRS-LMD      | 52.8  |       |       |       |       | 43.8  |       |       |       |       | 48.3   | 9       |
| CALIPSO-GOCCP | 53.5  |       |       |       |       | 66.5  |       |       |       |       | 60     | 13.1    |
| CALIPSO-ST    | 58.3  |       |       |       |       | 67    |       |       |       |       | 62.7   | 8.8     |
| POLDER        |       |       |       |       |       | 45.5  |       |       |       |       | 45.5   | 0       |
| MISR          |       |       |       |       | 37.6  |       |       |       |       |       | 37.6   | 0       |
| M_mean        | 50.1  | 53.5  | 51.2  | 64.8  | 39.6  | 51.4  | 75.6  | 49.3  | 60.7  | 45.7  | 50.5   | 8.6     |
| M_range       | 28    | 0     | 35.7  | 0     | 3.3   | 31.9  | 0     | 29    | 0     | 2.1   |        |         |
| station       |       |       |       |       |       |       |       |       |       |       | 52.1   |         |

**Table S2.** Total cloud amount across the different observation times and different datasets in winter over NW region (unit: %). M\_mean is the mean cloud amount averaged over all datasets at each specific observation time, M\_range is the TCA range for all satellite datasets; T\_mean is the mean cloud amount averaged over all observation times for each satellite dataset, T\_range is the TCA range among different observation times. Bold value with an underscore is the mean value averaged over 11 satellite datasets at all observation times, and bold and italic value is for station observation.

|               | 01:30 | 03:00 | 07:30 | 09:00 | 10:30 | 13:30 | 15:00 | 19:30 | 21:00 | 22:30 | T_mean | T_range |
|---------------|-------|-------|-------|-------|-------|-------|-------|-------|-------|-------|--------|---------|
| ISCCP-D1      |       | 42.8  |       | 47.9  |       |       | 55.1  |       | 44.5  |       | 47.6   | 12.3    |
| PATMOSX       | 53.9  |       | 71.5  |       |       | 34.6  |       | 38.3  |       |       | 49.6   | 36.9    |
| MODIS-CE      | 29.5  |       |       |       | 24.5  | 32.9  |       |       |       | 33.1  | 30     | 8.5     |
| MODIS-ST      | 47    |       |       |       | 73.4  | 73.2  |       |       |       | 47.6  | 60.3   | 26.3    |
| HIRS          | 52    |       | 53.9  |       |       | 36.1  |       | 48.3  |       |       | 47.6   | 17.8    |
| TOVSB         | 54.7  |       | 68    |       |       | 69.3  |       | 47.9  |       |       | 60     | 21.4    |
| AIRS-LMD      | 39.3  |       |       |       |       | 41.2  |       |       |       |       | 40.2   | 1.9     |
| CALIPSO-GOCCP | 40.2  |       |       |       |       | 47    |       |       |       |       | 43.6   | 6.8     |
| CALIPSO-ST    | 52.4  |       |       |       |       | 49.3  |       |       |       |       | 50.9   | 3       |
| POLDER        |       |       |       |       |       | 25.5  |       |       |       |       | 25.5   | 0       |
| MISR          |       |       |       |       | 28.7  |       |       |       |       |       | 28.7   | 0       |
| M_mean        | 46.1  | 42.8  | 64.4  | 47.9  | 42.2  | 45.5  | 55.1  | 44.8  | 44.5  | 40.3  | 44     | 12.3    |
| M_range       | 25.2  | 0     | 17.6  | 0     | 48.8  | 47.7  | 0     | 10    | 0     | 14.5  |        |         |
| station       |       |       |       |       |       |       |       |       |       |       | 37.4   |         |

[illegible]

|                    | 01:30 | 03:00 | 07:30 | 09:00 | 10:30 | 13:30 | 15:00 | 19:30 | 21:00 | 22:30 | T_mean | T_range |
|--------------------|-------|-------|-------|-------|-------|-------|-------|-------|-------|-------|--------|---------|
| ISCCP-D1           |       | 54.3  |       | 54.1  |       |       | 52.8  |       | 52.3  |       | 53.4   | 2       |
| PATMOSX            | 45.8  |       | 62.1  |       |       | 34.4  |       | 41.9  |       |       | 46.1   | 27.7    |
| MODIS-CE           | 22.1  |       |       |       | 26.8  | 38.5  |       |       |       | 22.4  | 27.5   | 16.4    |
| MODIS-ST           | 52.5  |       |       |       | 76.5  | 81.3  |       |       |       | 53    | 65.8   | 28.8    |
| HIRS               | 59.2  |       | 60    |       |       | 30.7  |       | 44.7  |       |       | 48.7   | 29.3    |
| TOVSB              | 46.7  |       | 54.6  |       |       | 48.3  |       | 38.2  |       |       | 47     | 16.4    |
| AIRS-LMD           | 37.6  |       |       |       |       | 38.8  |       |       |       |       | 38.2   | 1.2     |
| CALIPSO-GOCCP      | 29.5  |       |       |       |       | 37.8  |       |       |       |       | 33.6   | 8.3     |
| CALIPSO-ST         | 39.9  |       |       |       |       | 40.3  |       |       |       |       | 40.1   | 0.4     |
| POLDER             |       |       |       |       |       | 25.5  |       |       |       |       | 25.5   | 0       |
| MISR               |       |       |       |       | 31.5  |       |       |       |       |       | 31.5   | 0       |
| M_mean             | 41.7  | 54.3  | 58.9  | 54.1  | 44.9  | 41.7  | 52.8  | 41.6  | 52.3  | 37.7  | 41.6   | 11.9    |
| M_range<br>station | 37.1  | 0     | 7.5   | 0     | 49.7  | 55.8  | 0     | 6.5   | 0     | 30.6  |        |         |

**Table S5.** Total cloud amount across the different observation times and different datasets in summer over TP region (unit: %). M\_mean is the mean cloud amount averaged over all datasets at each specific observation time, M\_range is the TCA range for all satellite datasets; T\_mean is the mean cloud amount averaged over all observation times for each satellite dataset, T\_range is the TCA range among different observation times. Bold value with an underscore is the mean value averaged over 11 satellite datasets at all observation times, and bold and italic value is for station observation.

[illegible]

**Table S6.** Total cloud amount across the different observation times and different datasets in winter over NE region (unit: %). M\_Mean is the mean cloud amount averaged over all datasets at each specific observation time, M\_range is the TCA range for all satellite datasets; T\_Mean is the mean cloud amount averaged over all observation times for each satellite dataset, T\_range is the TCA range among different observation times. Bold value with an underscore is the mean value averaged over 11 satellite datasets at all observation times, and bold and italic value is for station observation.

|                    | 01:30 | 03:00 | 07:30 | 09:00 | 10:30 | 13:30 | 15:00 | 19:30 | 21:00 | 22:30 | T_mean | T_range |
|--------------------|-------|-------|-------|-------|-------|-------|-------|-------|-------|-------|--------|---------|
| ISCCP-D1           |       | 38.7  |       | 47.1  |       |       | 63.8  |       | 45.1  |       | 48.7   | 25.1    |
| PATMOSX            | 54.7  |       | 72.6  |       |       | 46.7  |       | 48    |       |       | 55.5   | 25.9    |
| MODIS-CE           | 32.6  |       |       |       | 25.8  | 48.8  |       |       |       | 37.6  | 36.2   | 23      |
| MODIS-ST           | 60.2  |       |       |       | 54.6  | 63.4  |       |       |       | 61.8  | 60     | 8.8     |
| HIRS               | 62.5  |       | 54.7  |       |       | 44.3  |       | 58.2  |       |       | 54.9   | 18.2    |
| TOVSB              | 73.1  |       | 68.7  |       |       | 77.7  |       | 70.2  |       |       | 72.4   | 9       |
| AIRS-LMD           | 71.9  |       |       |       |       | 60    |       |       |       |       | 66     | 11.9    |
| CALIPSO-GOCCP      | 43.7  |       |       |       |       | 56.6  |       |       |       |       | 50.2   | 12.9    |
| CALIPSO-ST         | 56.8  |       |       |       |       | 63.1  |       |       |       |       | 60     | 6.2     |
| POLDER             |       |       |       |       |       | 25    |       |       |       |       | 25     | 0       |
| MISR               |       |       |       |       | 27.2  |       |       |       |       |       | 27.2   | 0       |
| M_mean             | 57    | 38.7  | 65.4  | 47.1  | 35.8  | 54    | 63.8  | 58.8  | 45.1  | 49.7  | 50.5   | 12.8    |
| M_range<br>station | 40.5  | 0     | 17.9  | 0     | 28.8  | 52.6  | 0     | 22.2  | 0     | 24.2  |        |         |
